# Supplementary material
Source: MDPI journal article supplement (https://www.mdpi.com/2073-4344/13/9/1237)
Supplement: s1 [file s1]

Supporting Information

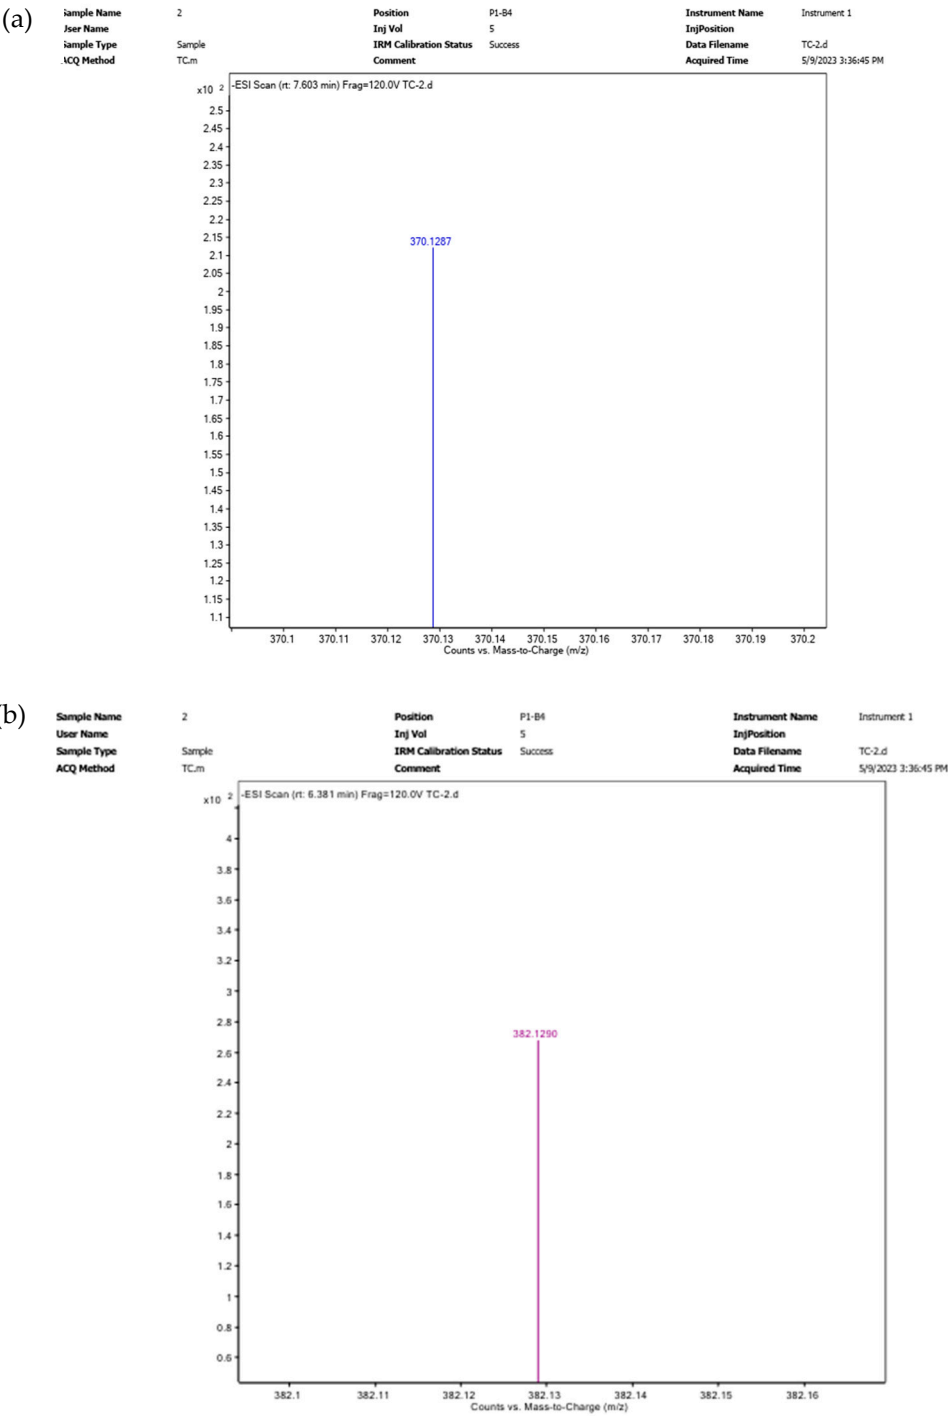

(c)

|             |        |                        |         |                 |                     |
|-------------|--------|------------------------|---------|-----------------|---------------------|
| Sample Name | 2      | Position               | P1-B4   | Instrument Name | Instrument 1        |
| User Name   |        | Inj Vol                | 5       | InjPosition     |                     |
| Sample Type | Sample | IRM Calibration Status | Success | Data Filename   | TC-2.d              |
| ACQ Method  | TC.m   | Comment                |         | Acquired Time   | 5/9/2023 3:36:45 PM |

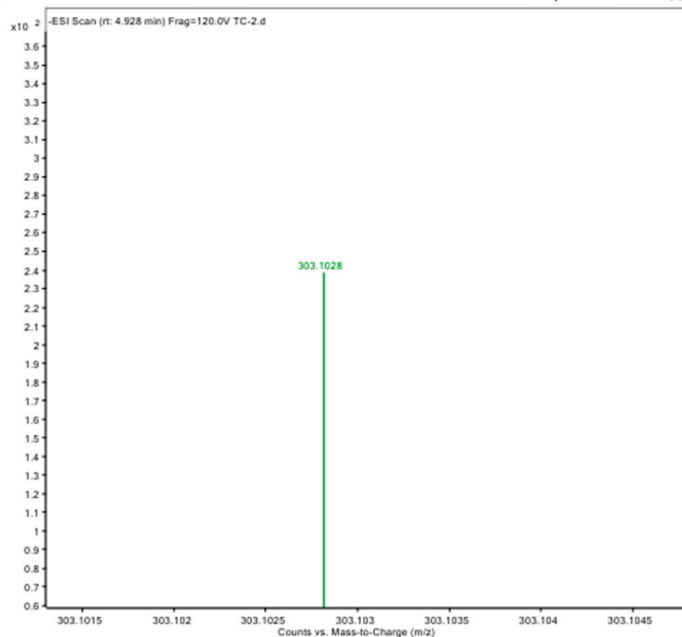

(d)

|             |        |                        |         |                 |                     |
|-------------|--------|------------------------|---------|-----------------|---------------------|
| Sample Name | 2      | Position               | P1-B4   | Instrument Name | Instrument 1        |
| User Name   |        | Inj Vol                | 5       | InjPosition     |                     |
| Sample Type | Sample | IRM Calibration Status | Success | Data Filename   | TC-2.d              |
| ACQ Method  | TC.m   | Comment                |         | Acquired Time   | 5/9/2023 3:36:45 PM |

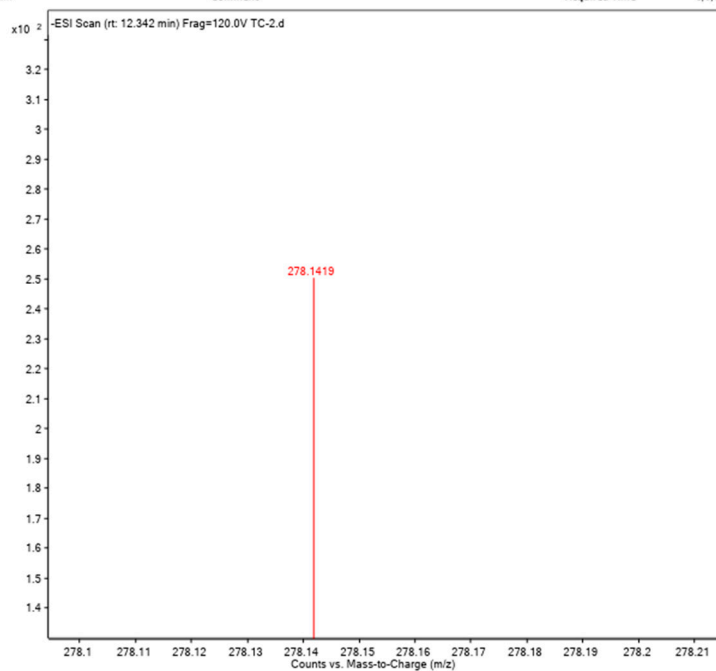

(e)

|             |        |                        |         |                 |                     |
|-------------|--------|------------------------|---------|-----------------|---------------------|
| Sample Name | 2      | Position               | P1-B4   | Instrument Name | Instrument 1        |
| User Name   |        | Inj Vol                | 5       | InjPosition     |                     |
| Sample Type | Sample | IRM Calibration Status | Success | Data Filename   | TC-2.d              |
| ACQ Method  | TC.m   | Comment                |         | Acquired Time   | 5/9/2023 3:36:45 PM |

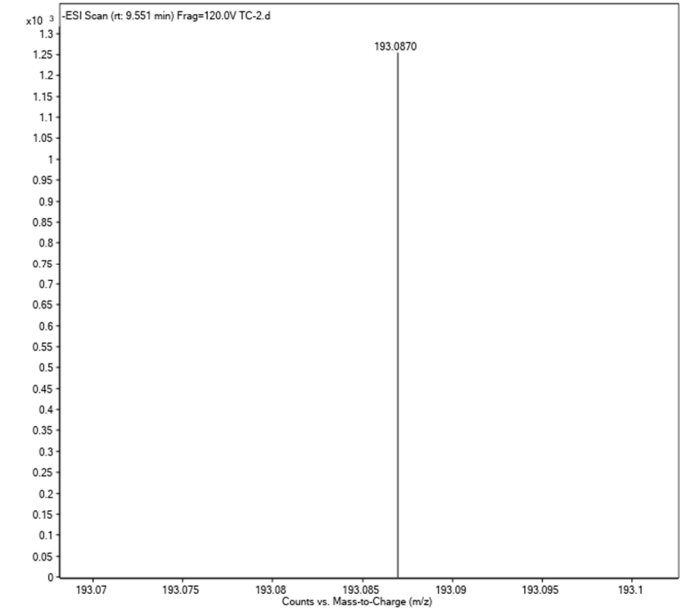

(f)

|             |        |                        |         |                 |                     |
|-------------|--------|------------------------|---------|-----------------|---------------------|
| Sample Name | 2      | Position               | P1-B4   | Instrument Name | Instrument 1        |
| User Name   |        | Inj Vol                | 5       | InjPosition     |                     |
| Sample Type | Sample | IRM Calibration Status | Success | Data Filename   | TC-2.d              |
| ACQ Method  | TC.m   | Comment                |         | Acquired Time   | 5/9/2023 3:36:45 PM |

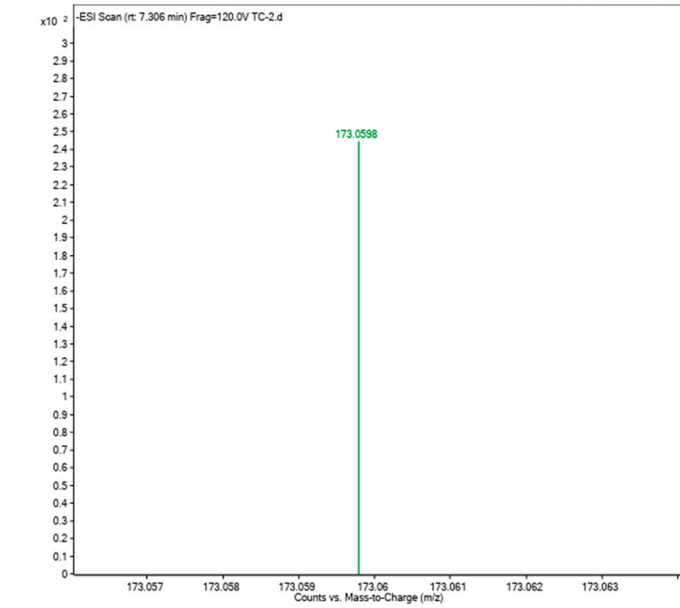

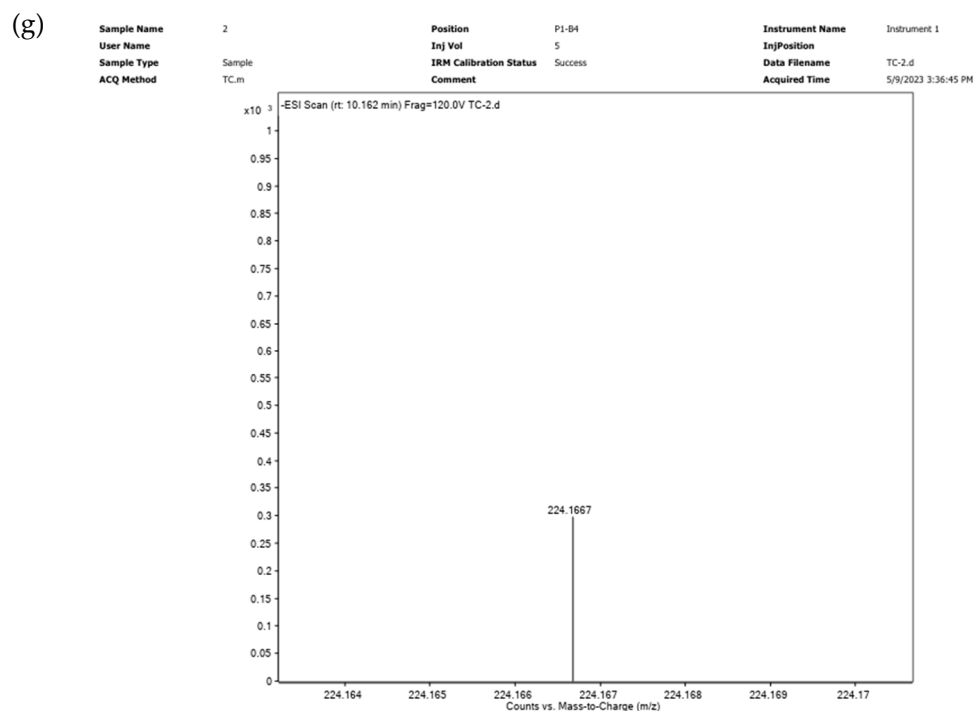

**Figure S1.** (a-g) Detailed data graph of TC degradation by-products

**Table S1.**

The proposed transformation products of TC.

|    | m/z | Molecular formula                                             | Chemical structure |
|----|-----|---------------------------------------------------------------|--------------------|
| TC | 445 | C <sub>22</sub> H <sub>24</sub> O <sub>8</sub> N <sub>2</sub> |                    |
| a  | 370 | C <sub>20</sub> H <sub>21</sub> O <sub>6</sub> N              |                    |
| b  | 382 | C <sub>21</sub> H <sub>21</sub> O <sub>6</sub> N              |                    |
| c  | 303 | C <sub>30</sub> H <sub>16</sub> O <sub>3</sub>                |                    |
| d  | 278 | C <sub>15</sub> H <sub>21</sub> O <sub>4</sub> N              |                    |

|   |     |                    |                                                                                     |
|---|-----|--------------------|-------------------------------------------------------------------------------------|
| e | 193 | $C_{11}H_{14}O_3$  | 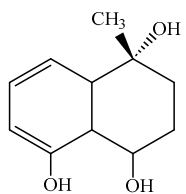 |
| f | 173 | $C_{11}H_{10}O_2$  |  |
| g | 224 | $C_{13}H_{23}O_2N$ |  |

---
